# Supplementary material for: Sequencing of DICER1 in sarcomas identifies biallelic somatic DICER1 mutations in an adult-onset embryonal rhabdomyosarcoma
Source: PubMed Central journal article supplement — Br J Cancer. 2017 May 18;116(12):1621–6. doi: 10.1038/bjc.2017.147 (PMC5518865; doi:10.1038/bjc.2017.147), 2017-05-18
Supplement: bjc2017147x1.pdf [file bjc2017147x1.pdf]

## SUPPLEMENTAL INFORMATION

### **Sequencing of *DICER1* in sarcomas identifies biallelic somatic *DICER1* mutations in an adult-onset embryonal rhabdomyosarcoma**

**Leanne de Kock, Barbara Rivera, Timothée Revil, Paul Thorner, Catherine Goudie, Dorothée Bouron-Dal Solio, Catherine S. Choong, John R. Priest, Paul J. van Diest, Jantima Tanboon, Anja Wagner, Jiannis Ragoussis, Peter F.M. Choong and William D. Foulkes**

**Correspondence:** Dr. William D. Foulkes at the Department of Medical Genetics, Lady Davis Institute, Segal Cancer Centre, Jewish General Hospital, 3755 Côte-Sainte-Catherine Road, Montreal, QC, Canada, H3T 1E2.  
Email: [william.foulkes@mcgill.ca](mailto:william.foulkes@mcgill.ca).

## SUPPLEMENTAL MATERIALS AND METHODS

### Patients and Samples:

We collected a total of 73 sarcomas as follows: 56 sarcoma samples (53 fresh frozen, and 3 Formalin-fixed paraffin-embedded (FFPE)) were obtained from the Victorian Cancer Biobank, Melbourne, Australia. Matched normal genomic DNA (gDNA) was obtained where possible [cases 1 to 43 and 45 to 56]; 4 cases of embryonal sarcoma of the liver (FFPE-derived) were acquired from Siriraj Hospital, Bangkok, Thailand [cases 57 to 60]; a single multicystic sarcoma of the thigh (FFPE-derived) was acquired from The Hospital for Sick Children, Toronto, Canada [case 61]; 11 Ewing sarcomas (5 fresh frozen and 6 FFPE-derived) were obtained from the Universitair Medisch Centrum in Utrecht, The Netherlands [cases 62 to 72]; and 1 additional case of Ewing sarcoma (FFPE-derived) was obtained from Erasmus MC University Medical Center, Rotterdam, The Netherlands [case 73] (see Supplemental Tables S2a and S2b).

### Rationale for inclusion of embryonal sarcomas of the liver:

The four cases of embryonal sarcoma of the liver were included because this malignancy often arises from a benign cystic lesion, known as mesenchymal hamartoma. This development sequence could be regarded as analogous to that of other DICER1-related tumours, including DICER1 anaplastic sarcoma of the kidney arising from cystic nephroma (Wu *et al*, 2016), and Type II and Type III pleuropulmonary blastoma (PPB) arising within a pre-existing Type I PPB lesion.

### Bioinformatics methods:

We performed SNP and INDEL discovery on Fluidigm-derived sequencing data using the Freebayes variant caller software v0.9.21 (Garrison & Gabor, 2012). All variants with alternate allele frequencies  $\geq 10\%$  were called and subsequently annotated with functional prediction using SnpEff v.4.1 (Cingolani *et al*, 2012b). Additionally, functional annotation of variants present in two public databases, NCBI dbSNP (Sherry *et al*, 2001) and dbNSFP (Liu *et al*, 2013), was added using SnpSift (Cingolani *et al*, 2012a). Depth of coverage was calculated for all samples using bedtools 2.25.0 (Quinlan & Hall, 2010) and at least 80% of the target region was covered at a depth of 10 or more reads in all 67 samples (Supplementary Figure S2).

Cloning experiments:

To determine the phase and effect of the mutations identified in Case 1, DNA and RNA were extracted from the fresh frozen tumour using the Qiagen DNeasy Blood & Tissue kit and the RNeasy Mini kit, respectively. cDNA was synthesised from RNA using Superscript III (Invitrogen). PCR amplification was performed using LongAmp Hot Start Taq DNA Polymerase (New England Biolabs Inc.) and the following primer pairs: *cDNA (exon 10 to 25)*: 5'-CCTATGTTCAATCTAAAGGAAGAGC-3'; and 5'-ATTAGTGGCCGCATCATGG-3'; *DNA (exon 11 to intron 12)*: 5'-GGCAGACAGCATAACAGCAGA-3'; and 5'-TGAACATGTAGATGACTACAAAAGC-3'. PCR fragments were TA cloned into pCR-XL-TOPO (Invitrogen) following the manufacturer recommendations. DNA from 48 cDNA clones and 24 DNA clones was collected using the QIAprep Spin Miniprep Kit (Qiagen) and Sanger sequenced (McGill University and Génome Québec Innovation Centre (MUGQIC)).

Droplet Digital PCR (ddPCR) experiment to investigate DICER1 mosaicism:

Investigation of the mosaic origin of the two *DICER1* mutations identified in case 1 was performed using the QX200 Droplet Digital PCR system (Bio-Rad Laboratories, Inc., Hercules, CA, USA). Custom TaqMan® probes (part 4331349, Life Technologies, Carlsbad, CA, USA) aimed to target the mutant alleles (c.5439G>T, p.E1813D (exon 25) and c.1785\_1786insA, p.T596Nfs\*3 (exon 11)) were designed for this purpose using the Custom TaqMan® Assay Design Tool (Life Technologies) and are listed in the table below:

| <b>DICER1 Mutation</b>    | <b>Target assay</b> | <b>Probe &amp; Primer Sequences</b>                                                                                                                                      |
|---------------------------|---------------------|--------------------------------------------------------------------------------------------------------------------------------------------------------------------------|
| c.1785_1786insA (exon 11) | T596Nfs_ANEPR9P_A   | F primer: TGGGAAAACGTCATCATCATCCAT<br>R primer: TCAGATCTTGAGAAACAAGTGTCCAA<br>VIC probe: AGTCTACCAGTATCAAC<br>FAM probe: TCTCACCAGTTATCAAC                               |
| c.5439G>T (exon 25)       | E1813D_ANKA3JE_T    | F primer: CAGTGACATCCCCTATCCATGTAA<br>R primer: GGAGGATGAAGAGAAAGAAGAGGATATTG<br>VIC probe: TTTTGA <sup>G</sup> TCGCTTGCTG<br>FAM probe: ATTTTGA <sup>T</sup> TCGCTTGCTG |

The 20 µl reaction mix consisted of 10 µl of 2x ddPCR SuperMix for Probes (Bio-Rad Laboratories), 0.5 µl of the 40X SNP genotyping assay (T596Nfs\_ANEPR9P or E1813D\_ANKA3JE), 8.5 µl of water and 1 µl of

genomic DNA (50ng/μl). Assays were validated by temperature gradient to ensure optimal separation of alternate and reference-allele-containing droplets. Cycling conditions for the reaction were 95°C for 10 min, followed by 45 cycles of 94°C for 30 sec and 60°C for 1 min, 98°C for 10 minutes and finally a 10°C hold on a Life Technologies Veriti thermal cycler. Data was analysed using QuantaSoft v1.6.6 (Bio-Rad Laboratories) with default parameters. Each experiment was performed in duplicate on a set of samples including the tumour and adjacent normal DNA's from patient 1, 6 negative controls which were known not to harbour either of the mutations in question, 5 to 6 positive control DNAs into which we spiked DNA harbouring the target mutations at varying proportions, and two reference DNA samples (NA10843 and HuRef) plus 1 non-template control. This experiment was performed by The Centre for Applied Genomics, The Hospital for Sick Children, Toronto, Canada.

The results of the experiment are presented in Supplemental Table S4. In summary, we detected both the exon 11 and exon 25 mutations in ~1.10% frequency in the adjacent normal DNA sample. Our interpretation of the mutations being present at almost exactly the same frequency is that there is low-level tumour DNA contamination of the adjacent normal sample. Unfortunately, no additional non-tumourous DNA samples were available from the now-deceased patient. Nevertheless, we believe that the results of the ddPCR experiment suggest that it is unlikely that either of the pathogenic mutations from case 1 are mosaic in origin.

#### *TruSight Tumor 15 Panel Sequencing of Case 1:*

Given the young age of sarcoma onset in case 1 (at 23 years of age), a *TP53* germ-line mutation may be suspected. We therefore performed targeted sequencing of *TP53* in the patient's tumour and adjacent normal DNA samples using the TruSight Tumor 15 panel from Illumina. The panel targets the full coding region of *TP53* in addition to regions of 14 other genes that are frequently somatically-mutated in solid tumours (additional information on the capture design and protocol can be found at the following address: <https://www.illumina.com/content/dam/illumina-marketing/documents/products/datasheets/trusight-tumor-15-data-sheet-1170-2015-003.pdf>). DNA quantification, library preparation and sequencing in a MiSeq Sequencer were performed following manufacturer specifications. The obtained sequencing data was aligned to the Human

reference sequence (Human\_v37p10\_dbsnp135) and was analysed using Soft Genetics software (version 2.4.2) using default parameters. All variants with alternate allele frequencies  $\geq 5\%$  were called. Subsequent variant annotation was performed using the web-based wANNOVAR software (<http://wannovar.wglab.org/>) and then manually evaluated using the Integrative Genomics Viewer (version 2.3) (<https://software.broadinstitute.org/software/igv/download>). Final results are presented in Supplemental Table S5. In summary, 12 variants were called (all germ-line in origin) in 6 genes, including 3 silent missense variants (*PDGFRA* (n = 2); *KIT* (1)), 6 intronic variants (*EGFR* (3); *MET* (2); *ERBB2* (1)), and 3 and low-frequency variants were identified in the 3'UTR of *TP53*. In addition, loss of heterozygosity (LOH) is evident in the tumour on chromosome 7, involving *EGFR* (extent of LOH not known). No pathogenic germ-line or somatic *TP53* mutations were identified.

Copy Number Variation (CNV) experiment (ddPCR):

A total of 59 tumours samples and 52 normal samples (52 pairs and 7 non-paired tumours) for which sufficient, good quality DNA was available were investigated for the presence of copy number variations involving the *DICER1* locus. Given the plausible presence of somatic CNVs in the sarcomas, two different experiments were performed using a reference probe in either the *TERT* locus on chromosome 5 or within the *AMOT* locus on the X chromosome. Copy number estimation of *DICER1* was performed using the QX200 Droplet Digital PCR system (Bio-Rad Laboratories, Inc., Hercules, CA, USA) using the primers and probe assays outlined in the table below:

| Target Assay             |    | Reference Assay                                                              |   | TUMOUR<br>(n = 59) | NORMAL<br>(n = 52) |
|--------------------------|----|------------------------------------------------------------------------------|---|--------------------|--------------------|
| DICER1-<br>Hs00237483_cn | vs | TaqMan® Copy Number<br>Reference Assay, human,<br>TERT                       | → | Done               | Done               |
| DICER1-<br>Hs00237483_cn | vs | PrimePCR™ ddPCR™<br>Expression Probe Assay:<br>AMOT, Human<br>dHsaCPE5035959 | → | Done               | Done               |

Prior to the copy number experiment, 50 ng of genomic DNA was digested with 2.5U of NspI in a 5 µl reaction (New England Biolabs, Ipswich, Massachusetts, United States), 1 h x 37°C incubation and no enzyme

denaturation. The 20 µl copy number reaction mix consisted of 10 µl of 2x ddPCR SuperMix for Probes (Bio-Rad Laboratories), 1 µl of the copy number target assay (*DICER1*- Hs00237483\_cn (localized within the RNase IIIb domain of *DICER1*) labelled with FAM), 1 µl of the copy number reference assay (*TERT* (Life Technologies part 4403316, labelled with VIC) or *AMOT* (Bio-Rad Laboratories, AMOT\_dHsaCPE5035959 (assay is exonic) labelled with HEX)), 3 µl water and 5 µl of 10 ng/µl digested genomic DNA. All assays were validated by temperature gradient to ensure optimal separation of target and reference-containing droplets. Cycling conditions for the reaction were 95°C for 10 min, followed by 45 cycles of 94°C for 30 sec and 60°C for 1 min, 98°C for 10 minutes and finally a 10°C hold on a Life Technologies Veriti thermal cycler. Data was analysed using QuantaSoft v1.6.6 (Bio-Rad Laboratories) with default parameters and the *DICER1* vs *AMOT* CNV ratios were calculated taking the patients' gender (and therefore X load) into account. Two reference DNA samples (NA10843 and HuRef, both male) plus 1 to 2 non-template controls were included with the study samples. Experiments were performed at the Genetic Analysis Facility, The Centre for Applied Genomics, The Hospital for Sick Children, Toronto, Canada.

For the interpretation of CNVs, samples in which a copy number alteration was only evident in one of the two experiments (*DICER1* vs *TERT*; or *DICER1* vs *AMOT*) were considered as having a copy number alteration encompassing the reference gene locus (*TERT* or *AMOT*); samples for which both experiments resulted in a *DICER1*/reference copy number ratio of <1.25 or >2.7 were considered to be positive, representing a loss or gain in *DICER1*, respectively. Five cases were found to have a CNV involving the *DICER1* locus (8.5%). This is a minimal estimation given our resolution power. A summary of the findings is presented in Supplemental Table S6.

## SUPPLEMENTAL TABLES

**SUPPLEMENTAL TABLE S1a. The 20 most frequently mutated genes in 811 sarcomas from TCGA**

|    | Gene          | # Mutations in gene | # Samples with mutation in gene | Mutation frequency |
|----|---------------|---------------------|---------------------------------|--------------------|
| 1  | <i>TP53</i>   | 191                 | 179                             | 23.55%             |
| 2  | <i>PIK3CA</i> | 52                  | 47                              | 6.41%              |
| 3  | <i>ATRX</i>   | 52                  | 45                              | 6.41%              |
| 4  | <i>PCLO</i>   | 49                  | 29                              | 6.04%              |
| 5  | <i>LRP1B</i>  | 45                  | 28                              | 5.55%              |
| 6  | <i>PTEN</i>   | 44                  | 30                              | 5.43%              |
| 7  | <i>EWSR1</i>  | 43                  | 43                              | 5.30%              |
| 8  | <i>RB1</i>    | 40                  | 35                              | 4.93%              |
| 9  | <i>KMT2D</i>  | 38                  | 29                              | 4.69%              |
| 10 | <i>STAG2</i>  | 36                  | 34                              | 4.44%              |
| 11 | <i>OBSCN</i>  | 36                  | 24                              | 4.44%              |
| 12 | <i>FBXW7</i>  | 35                  | 32                              | 4.32%              |
| 13 | <i>SYNE1</i>  | 35                  | 25                              | 4.32%              |
| 14 | <i>FRG1BP</i> | 31                  | 21                              | 3.82%              |
| 15 | <i>NF1</i>    | 30                  | 25                              | 3.70%              |
| 16 | <i>PLEC</i>   | 30                  | 18                              | 3.70%              |
| 17 | <i>XIRP2</i>  | 29                  | 10                              | 3.58%              |
| 18 | <i>ARID1A</i> | 28                  | 22                              | 3.45%              |
| 19 | <i>DMD</i>    | 28                  | 19                              | 3.45%              |
| 20 | <i>RYR2</i>   | 28                  | 17                              | 3.45%              |

**Method of TCGA data retrieval and analysis:** A list of mutated genes\*\* from each of 7 sarcoma-specific studies (more information in Table S3b) was downloaded from The Cancer Genome Atlas Network (TCGA) database via the cBioportal (<http://www.cbioportal.org/index.do>). The data were consolidated to obtain the number of mutations in each gene and the number of samples with a mutation in the gene in question. The mutation frequency was then calculated based on the number of mutations identified within a gene and the total number of samples sequenced (n = 811). After sorting by mutation frequency, a list of the top 20 most frequently somatically-mutated genes in sarcomas was compiled.

\*\*genes that are in the top 500 recurrently-mutated ( $\geq 2$  mutations), are known cancer genes, or are detected by MutSig (<http://www.cbioportal.org/>)

**SUPPLEMENTARY TABLE S1b. Sarcoma subtypes comprising TCGA cohort**

|           | <b>Histology</b>                                                     | <b>#Samples</b> | <b>Institute(s)</b>                   | <b>PubMed Reference ID</b> |
|-----------|----------------------------------------------------------------------|-----------------|---------------------------------------|----------------------------|
| <b>1</b>  | Pediatric Ewing sarcoma                                              | 105             | DFCI                                  | PMID: 25186949             |
| <b>2</b>  | Ewing Sarcoma                                                        | 112             | Institut Curie                        | PMID: 25223734             |
| <b>3</b>  | Leiomyosarcoma                                                       | 134             | MSKCC (n = 27); TCGA (n = 107)        | PMID: 20601955 (MSKCC)     |
| <b>4</b>  | Dedifferentiated liposarcoma                                         | 109             | MSKCC (n = 50); TCGA (n = 29)         | PMID: 20601955 (MSKCC)     |
| <b>5</b>  | Pleomorphic liposarcoma                                              | 26              | MSKCC (n = 24); TCGA (n = 2)          | PMID: 20601955 (MSKCC)     |
| <b>6</b>  | Myxofibrosarcoma                                                     | 63              | MSKCC (n = 38); TCGA (n = 25)         | PMID: 20601955 (MSKCC)     |
| <b>7</b>  | Malignant Peripheral Nerve Sheath Tumour                             | 10              | TCGA                                  | --                         |
| <b>8</b>  | Synovial sarcoma                                                     | 34              | MSKCC (n = 24); TCGA (n = 10)         | PMID: 20601955 (MSKCC)     |
| <b>9</b>  | Embryonal Rhabdomyosarcoma                                           | 29              | NIH                                   | PMID: 24436047             |
| <b>10</b> | Alveolar Rhabdomyosarcoma                                            | 18              | NIH                                   | PMID: 24436047             |
| <b>11</b> | Mixed Alveolar/Embryonal Rhabdomyosarcoma                            | 3               | NIH                                   | PMID: 24436047             |
| <b>12</b> | Rhabdomyosarcoma-NOS                                                 | 3               | NIH                                   | PMID: 24436047             |
| <b>13</b> | Myxoid/round cell liposarcoma                                        | 21              | MSKCC                                 | PMID: 20601955             |
| <b>14</b> | Gastrointestinal stromal tumour                                      | 22              | MSKCC                                 | PMID: 20601955             |
| <b>15</b> | Desmoid/Aggressive Fibromatosis                                      | 2               | TCGA                                  | --                         |
| <b>16</b> | Undifferentiated Pleomorphic Sarcoma/High-Grade Spindle Cell Sarcoma | 50              | TCGA                                  | --                         |
| <b>17</b> | Uterine carcinosarcoma/uterine malignant mixed Mullerian             | 70              | Johns Hopkins (n = 22); TCGA (n = 57) | PMID: 25233892 (JHU)       |
|           | <b>Total:</b>                                                        | <b>811</b>      |                                       |                            |

**Abbreviations:** NOS, not otherwise specified; DFCI, Dana-Farber Cancer Institute; MSKCC, Memorial Sloan Kettering Cancer Center; TCGA, The Cancer Genome Atlas; NIH, National Institutes of Health.



**SUPPLEMENTAL TABLE S1c. *DICER1* variants in TGCA sarcoma cohort**

| Cases | Tumour Histology                                                     | Protein Change | DNA Change | DICER1 Domain                        | Mutation Status | #Mutations in Sample | Institute     | PubMed Reference ID |
|-------|----------------------------------------------------------------------|----------------|------------|--------------------------------------|-----------------|----------------------|---------------|---------------------|
| 1     | Ewing sarcoma                                                        | p.Q1832R       | c.5495A>G  | DUF                                  | Unknown         | 276                  | DFCI          | 25186949            |
| 2     | Ewing sarcoma                                                        | p.P365T        | c.1093C>A  | TRBPBD                               | Unknown         | 75                   | DFCI          | 25186949            |
| 3     | Leiomyosarcoma                                                       | p.N477S        | c.1430A>?  | HELICc                               | Somatic         | 24                   | TCGA          |                     |
| 4     | Malignant Peripheral Nerve Sheath Tumour                             | p.D1709N       | c.5125G>?  | RNase IIIb (hotspot)                 | Somatic         | 38                   | TCGA          |                     |
| 5     | Undifferentiated Pleomorphic Sarcoma/High-Grade Spindle Cell Sarcoma | p.A1560T       | c.4678G>?  | RNase IIIb (non-hotspot)             | Somatic         | 511                  | TCGA          |                     |
| 6     | Uterine Carcinosarcoma/Uterine Malignant Mixed Mullerian Tumour      | p.P986S        | c.2956C>T  | PAZ                                  | Unknown         | 5502                 | Johns Hopkins | 25233892            |
|       |                                                                      | p.L1164F       | c.3490C>T  | Between connector helix & RNase IIIa | Unknown         |                      |               |                     |
| 7     | Uterine Carcinosarcoma/Uterine Malignant Mixed Mullerian Tumour      | p.N1609H       | c.4825A>C  | Between RNase IIIa & RNase IIIb      | Unknown         | 5639                 | Johns Hopkins | 25233892            |
| 8     | Uterine Carcinosarcoma/Uterine Malignant Mixed Mullerian Tumour      | p.D1709N       | c.5125G>A  | RNase IIIb (hotspot)                 | Unknown         | 30                   | Johns Hopkins | 25233892            |
| 9     | Uterine Carcinosarcoma/Uterine Malignant Mixed Mullerian Tumour      | p.D1810V       | c.5429A>?  | RNase IIIb (hotspot)                 | Somatic         | 66                   | TCGA          |                     |
| 10    | Uterine Carcinosarcoma/Uterine Malignant Mixed Mullerian Tumour      | p.D1709N       | c.5125G>?  | RNase IIIb (hotspot)                 | Somatic         | 3863                 | TCGA          |                     |

**Abbreviations:** DFCI, Dana-Farber Cancer Institute; TCGA, The Cancer Genome Atlas Research Network

**SUPPLEMENTAL TABLE S2a. Sarcoma (various subtypes) clinical information**

| Case # | DEMOGRAPHICS |     |              |                | DIAGNOSIS & PATHOLOGY                                     |                                  |       |                                   |            | SURGERY                               | PERSONAL AND FAMILY HISTORY                             |                           | MATERIALS & METHODS |                          |                      |                     |
|--------|--------------|-----|--------------|----------------|-----------------------------------------------------------|----------------------------------|-------|-----------------------------------|------------|---------------------------------------|---------------------------------------------------------|---------------------------|---------------------|--------------------------|----------------------|---------------------|
|        | Age at Dx    | Sex | Age at Death | Cause of Death | Diagnosis                                                 | Tumour Site                      | Stage | Differentiation or Grade          | Bone vs ST | Surgical Procedure                    | Personal History of Cancer?                             | Family History of Cancer? | Sample Type         | DICER1 Sequencing Method | Germline DICER1 MLPA | Tumour CNV Analysis |
| 1      | 23.0         | F   | 27.8         | Disease        | Recurrent embryonal rhabdomyosarcoma                      | Retroperitoneum (broad ligament) | 4     | High grade                        | ST         | Ileo-colic resection                  | NR                                                      | NR                        | FFT                 | Fluidigm                 | Done                 | Done                |
| 2      | 53.3         | F   | 57.1         | Disease        | Metastatic Leiomyosarcoma (with non caseating granulomas) | R upper lobe of lung             | 4     | High grade                        | ST         | R metastasectomy                      | High grade leiomyosarcoma                               | NR                        | FFT                 | Fluidigm                 | Done                 | Done                |
| 3      | 22.0         | F   | 26.1         | Disease        | Undifferentiated sarcoma                                  | L lower lobe of lung             | 4     | Large moderately pleomorphic      | ST         | L lower lobectomy                     | Vulval neural ectodermal carcinoma (13y), Ewing sarcoma | NR                        | FFT                 | Fluidigm                 | Done                 | Done                |
| 4      | 36.9         | F   | NA           | NR             | Parosteal osteosarcoma                                    | Long bones of lower limb         | NR    | Low grade                         | Bone       | Biopsy of L femur                     | NR                                                      | NR                        | FFT                 | Fluidigm                 | Done                 | Done                |
| 5      | 54.0         | M   | NA           | NR             | Undifferentiated pleomorphic sarcoma                      | L proximal femur                 | 3     | High grade                        | ST         | L proximal femur                      | None                                                    | None                      | FFT                 | Fluidigm                 | Done                 | Done                |
| 6      | 47.2         | M   | NA           | NR             | High-grade intravascular sarcoma                          | R lung                           | 4     | High grade                        | ST         | R pneumonectomy                       | None                                                    | NR                        | FFT                 | Fluidigm                 | Done                 | Done                |
| 7      | 55.3         | M   | 56.4         | NR             | Undifferentiated pleomorphic sarcoma                      | Soft tissue of pelvis            | 3     | NR                                | ST         | L hemipelvectomy                      | None                                                    | NR                        | FFT                 | Fluidigm                 | Done                 | Done                |
| 8      | 37.7         | M   | NA           | NR             | Undifferentiated pleomorphic sarcoma                      | Soft tissue of L thigh           | 2A    | High Grade (4)                    | ST         | L thigh excision                      | NR                                                      | NR                        | FFT                 | Fluidigm                 | Done                 | Done                |
| 9      | 46.0         | M   | NA           | NA             | Pleomorphic liposarcoma                                   | L distal thigh                   | 4     | With myxoid and pleomorphic areas | ST         | L distal thigh excision               | Cutaneous leiomyosarcoma (pectoral)                     | NR                        | FFT                 | Fluidigm                 | Done                 | Done                |
| 10     | 73.9         | F   | 76.4         | NR             | Solitary fibrous tumour                                   | Ischiorectal fossa (anus)        | 1A    | Relatively benign                 | ST         | Laparotomy                            | Bladder tumour                                          | NR                        | FFT                 | Fluidigm                 | Done                 | Done                |
| 11     | 24.3         | F   | 26.4         | Disease        | Angiosarcoma                                              | R breast                         | 4     | High grade                        | ST         | R mastectomy                          | NR                                                      | NR                        | FFT                 | Fluidigm                 | Done                 | Done                |
| 12     | 26.1         | F   | NA           | NA             | Epitheloid haemangioendothelioma                          | R foot                           | 1B    | Low grade                         | ST         | Lower leg amputation                  | None                                                    | NR                        | FFT                 | Fluidigm                 | Done                 | Done                |
| 13     | 19.8         | M   | NA           | NA             | Synovial sarcoma                                          | R knee                           | 4     | Monophasic                        | ST         | Wide excision                         | NR                                                      | NR                        | FFT                 | Fluidigm                 | Done                 | Done                |
| 14     | 71.0         | M   | 81.3         | Disease        | Undifferentiated pleomorphic sarcoma                      | R thigh                          | 4     | NR                                | ST         | R thigh excision                      | None                                                    | NR                        | FFT                 | Fluidigm                 | Done                 | Done                |
| 15     | 32.0         | M   | NA           | NA             | Angiomatoid fibrous histiocytoma                          | L groin                          | 4     | Low grade                         | ST         | L groin/anterior pelvic wall excision | NR                                                      | Grandfather: Lung         | FFT                 | Fluidigm                 | Done                 | Done                |
| 16     | 21.9         | M   | NA           | NA             | Ewing sarcoma                                             | L clavicle                       | 4     | NA                                | Bone       | L clavicle excision                   | Lumber spinal Ewing sarcoma (11y)                       | NR                        | FFT                 | Fluidigm                 | Done                 | Done                |
| 17     | 30.4         | F   | NA           | NR             | Undifferentiated pleomorphic sarcoma                      | L thigh                          | 4     | Grade 3                           | ST         | L thigh excision                      | NR                                                      | None significant          | FFT                 | Fluidigm                 | Done                 | Done                |
| 18     | 75.6         | F   | NA           | NA             | Low grade chondrosarcoma                                  | L femoral shaft                  | 1B    | Low grade (2)                     | Bone       | L femoral shaft biopsy                | NR                                                      | NR                        | FFT                 | Fluidigm                 | Done                 | Done                |
| 19     | 81.2         | F   | NA           | NA             | Undifferentiated pleomorphic sarcoma                      | R thigh                          | 2B    | Intermediate grade                | ST         | R thigh excision                      | None                                                    | Brother: Liver ca.        | FFT                 | Fluidigm                 | Done                 | Done                |
| 20     | 77.9         | M   | 78.2         | Disease        | Undifferentiated pleomorphic sarcoma                      | Ilium                            | 4     | High grade pleomorphic            | ST         | Hindquarter amputation                | NR                                                      | NR                        | FFT                 | Fluidigm                 | Done                 | Done                |
| 21     | 40.4         | M   | NA           | NR             | Myxoid liposarcoma                                        | R popliteal fossa                | 2B/3  | NR                                | ST         | R popliteal fossa excision            | None                                                    | NR                        | FFT                 | Fluidigm                 | Done                 | Done                |

**SUPPLEMENTAL TABLE S2a Continued. Sarcoma (various subtypes) clinical information**

| Case # | DEMOGRAPHICS |     |              |                | DIAGNOSIS & PATHOLOGY                  |                       |       |                                                                                                            |            | SURGERY                             | PERSONAL AND FAMILY HISTORY                       |                                  | MATERIALS & METHODS |                          |                 |                  |        |
|--------|--------------|-----|--------------|----------------|----------------------------------------|-----------------------|-------|------------------------------------------------------------------------------------------------------------|------------|-------------------------------------|---------------------------------------------------|----------------------------------|---------------------|--------------------------|-----------------|------------------|--------|
|        | Age at Dx    | Sex | Age at Death | Cause of Death | Diagnosis                              | Tumour Site           | Stage | Differentiation or Grade                                                                                   | Bone vs ST | Surgical Procedure                  | Personal History of Cancer?                       | Family History of Cancer?        | Sample Type         | DICER1 Sequencing Method | Germline DICER1 | MLPACNV Analysis | Tumour |
| 22     | 21.1         | M   | NA           | NA             | Desmoplastic small round cell tumour   | Ascending colon       | 4     | NR                                                                                                         | ST         | R colon and small bowel resection   | None                                              | NR                               | FFT                 | Fluidigm                 | Done            | Done             | Done   |
| 23     | 70.3         | F   | NA           | NA             | Adamantinoma                           | Tibia                 | 1     | NR                                                                                                         | Bone       | Tibia excision                      | NR                                                | Mother: Bowel; Father: NR cancer | FFT                 | Fluidigm                 | Done            | Done             | Done   |
| 24     | 47.9         | F   | NA           | NR             | Undifferentiated pleomorphic sarcoma   | R lower lobe of lung  | 4     | High grade                                                                                                 | ST         | R lower lobectomy                   | Retroperitoneal sarcoma; L kidney cancer; 5x BCCs | NR                               | FFT                 | Fluidigm                 | Done            | Done             | Done   |
| 25     | 64.3         | F   | NA           | NR             | Undifferentiated pleomorphic sarcoma   | L lower lobe of lung  | 4     | High grade                                                                                                 | ST         | L lower lobectomy                   | Osteosarcomatous lesion in chest wall             | NR                               | FFT                 | Fluidigm                 | Done            | Done             | Done   |
| 26     | 60.3         | M   | NA           | NA             | Solitary fibrous tumour                | Rectum                | 3     | High grade. Malignant haemangiopericytoma                                                                  | ST         | High anterior resection             | NR                                                | None                             | FFT                 | Fluidigm                 | Done            | Done             | Done   |
| 27     | 47.3         | M   | NA           | NA             | Dedifferentiated liposarcoma           | Transverse colon      | 1     | High grade (3), features are of a spindle cell sarcoma                                                     | ST         | En bloc R hemicolectomy             | None                                              | NR                               | FFT                 | Fluidigm                 | Done            | Done             | Done   |
| 28     | 87.4         | M   | NA           | NR             | Undifferentiated pleomorphic sarcoma   | L forearm             | 2B    | High grade                                                                                                 | ST         | L forearm excision                  | None                                              | NR                               | FFT                 | Fluidigm                 | Done            | Done             | Done   |
| 29     | 26.5         | F   | NA           | NA             | Undifferentiated sarcoma of the breast | L breast              | 2     | High grade/undifferentiated                                                                                | ST         | L breast/chest wall resection       | None                                              | None                             | FFT                 | Fluidigm                 | Done            | Done             | Done   |
| 30     | 50.6         | M   | NA           | NA             | Metastatic epithelioid sarcoma         | L inguinal lymph node | 4     | High grade/undifferentiated                                                                                | ST         | Inguinal lymphadenectomy            | Skin cancer                                       | Mother: Brain tumour             | FFT                 | Fluidigm                 | Done            | Done             | Done   |
| 31     | 45.3         | F   | 46.8         | Disease        | Periacetabular osteosarcoma            | L pelvis              | 4     | Pleomorphic spindle cells                                                                                  | Bone       | L periacetabular wider resection    | None                                              | None                             | FFT                 | Fluidigm                 | Done            | Done             | Done   |
| 32     | 43.0         | M   | NA           | Disease        | Ewing sarcoma/ PNET                    | L chest wall          | 4     | NA                                                                                                         | Bone       | Wide en bloc resection              | None                                              | NR                               | FFT                 | Fluidigm                 | Done            | Done             | Done   |
| 33     | 38.4         | M   | 40.8         | Disease        | Metastatic clear cell sarcoma          | Tibia soft tissue     | 4     | NR                                                                                                         | ST         | Wide en bloc resection              | Sarcoma                                           | NR                               | FFT                 | Fluidigm                 | Done            | Done             | Done   |
| 34     | 64.8         | M   | NA           | NR             | Chordoma (post radiotherapy)           | Sacrococcygeal        | 2A    | Locally advanced                                                                                           | Bone       | En bloc resection including rectum  | NR                                                | No                               | FFT                 | Fluidigm                 | Done            | Done             | Done   |
| 35     | 64.5         | F   | NA           | NR             | Myxofibrosarcoma                       | Back of L thigh       | 2B    | Intermediate grade                                                                                         | ST         | L thigh excision                    | None                                              | NR                               | FFT                 | Fluidigm                 | Done            | Done             | Done   |
| 36     | 48.8         | M   | 50.3         | Disease        | Myxoid liposarcoma (post radiotherapy) | R thigh               | 4     | NR                                                                                                         | ST         | Wide resection of R quadriceps      | Small cell lung cancer                            | NR                               | FFT                 | Fluidigm                 | Done            | Done             | Done   |
| 37     | 18.8         | F   | NA           | NR             | Ewing sarcoma (post-chemotherapy)      | Femur                 | 3     | NA                                                                                                         | Bone       | En bloc resection of L distal femur | NR                                                | NR                               | FFT                 | Fluidigm                 | Done            | Done             | Done   |
| 38     | 68.1         | M   | 70.0         | Disease        | Myxofibrosarcoma                       | R chest wall          | 4     | High-grade/pleomorphic undifferentiated sarcoma                                                            | ST         | Wide excision chest wall            | Diffuse Large B-cell Lymphoma                     | NR                               | FFT                 | Fluidigm                 | Done            | Done             | Done   |
| 39     | 61.0         | M   | NA           | NA             | Leiomyosarcoma                         | R inguinal            | 1A    | Low grade                                                                                                  | ST         | R inguinal excision                 | NR                                                | NR                               | FFT                 | Fluidigm                 | Done            | Done             | Done   |
| 40     | 50           | F   | 52           | NR             | Undifferentiated pleomorphic sarcoma   | Small bowel           | 4     | Ulcerated, high grade                                                                                      | ST         | Resection of small bowel            | Cardiac sarcoma                                   | NR                               | FFT                 | Fluidigm                 | Done            | Done             | Done   |
| 41     | 39.2         | F   | NA           | NR             | Liposarcoma                            | Retroperitoneum       | 2B    | Components of well diff and de-diff liposarcoma, with low grade de-diff showing metaplastic bone formation | ST         | Laparotomy                          | NR                                                | NR                               | FFT                 | Fluidigm                 | Done            | Done             | Done   |
| 42     | 73.0         | M   | NA           | NR             | Myxofibrosarcoma                       | R shoulder            | 1B    | Low grade                                                                                                  | ST         | Wide excision, R shoulder           | Skin SCCs and TURP                                | Brother: Prostate ca.            | FFT                 | Fluidigm                 | Done            | Done             | Done   |

**SUPPLEMENTAL TABLE S2a Continued. Sarcoma (various subtypes) clinical information**

| Case # | DEMOGRAPHICS |     |              |                | DIAGNOSIS & PATHOLOGY                                       |                      |        |                                          |            | SURGERY                                            | PERSONAL AND FAMILY HISTORY              |                           | MATERIALS & METHODS |                          |                      |                 |
|--------|--------------|-----|--------------|----------------|-------------------------------------------------------------|----------------------|--------|------------------------------------------|------------|----------------------------------------------------|------------------------------------------|---------------------------|---------------------|--------------------------|----------------------|-----------------|
|        | Age at Dx    | Sex | Age at Death | Cause of Death | Diagnosis                                                   | Tumour Site          | Stage  | Differentiation or Grade                 | Bone vs ST | Surgical Procedure                                 | Personal History of Cancer?              | Family History of Cancer? | Sample Type         | DICER1 Sequencing Method | Germline DICER1 MLPA | Tumour Analysis |
| 43     | 47.5         | F   | 49.9         | Disease        | Leiomyosarcoma                                              | Retroperitoneum      | 4      | Moderate pleomorphism                    | ST         | Resection of retroperitoneum                       | Breast cancer; Low grade glioma          | No                        | FFT                 | Fluidigm                 | Done                 | Done            |
| 44     | 33.8         | F   | NA           | NA             | Liposarcoma associated with radiotherapy changes            | L retroperitoneum    | 3      | High grade, well differentiated.         | ST         | Laparotomy                                         | None                                     | No                        | FFT                 | Fluidigm                 | Done                 | Done            |
| 45     | 62.9         | M   | NA           | NR             | Liposarcoma with radiation effect                           | L axilla             | Benign | NR                                       | ST         | L wide axillary dissection                         | Long history of benign lipomas           | NR                        | FFT                 | Fluidigm                 | Done                 | Done            |
| 46     | 79.0         | F   | NA           | NR             | Pleomorphic sarcoma with giant cells                        | L adductor magnus    | 4      | Undifferentiated                         | ST         | L adductor magnus excision                         | NR                                       | NR                        | FFT                 | Fluidigm                 | Done                 | Done            |
| 47     | 77.5         | F   | NA           | NA             | Liposarcoma (post radiotherapy)                             | R thigh              | T2b    | Well differentiated. Low grade           | ST         | R thigh excision                                   | NR                                       | NR                        | FFT                 | Fluidigm                 | Done                 | Done            |
| 48     | 72.8         | F   | NA           | NA             | Undifferentiated pleomorphic sarcoma                        | R tibia              | 3      | High grade                               | ST         | Wide en bloc resection                             | NR                                       | NR                        | FFT                 | Fluidigm                 | Done                 | Done            |
| 49     | 39.3         | F   | NA           | NA             | Low grade fibromyxoid sarcoma                               | L thigh              | 1A     | Low grade                                | ST         | L thigh excision                                   | None                                     | NR                        | FFT                 | Fluidigm                 | Done                 | Done            |
| 50     | 38.3         | M   | 39.4         | Disease        | Epithelioid angiosarcoma                                    | Small intestine      | 4      | Moderately to poorly differentiated      | ST         | Abdominoperineal resection                         | None                                     | None                      | FFT                 | Fluidigm                 | Done                 | Done            |
| 51     | 18.3         | F   | NA           | NA             | Metastatic malignant peripheral nerve sheath tumour         | L lower lobe of lung | 4      | Low grade, cartilaginous differentiation | ST         | L VATS wedge                                       | Malignant peripheral nerve sheath tumour | Bowel cancer              | FFT                 | Fluidigm                 | Done                 | Done            |
| 52     | 76.6         | M   | 77.0         | Disease        | Undifferentiated pleomorphic sarcoma                        | R buttock            | 4      | High grade                               | ST         | R buttock excision                                 | Leiomyosarcoma                           | NR                        | FFT                 | Fluidigm                 | Done                 | Done            |
| 53     | 68.1         | F   | NA           | NA             | Gastrointestinal stromal tumour (GIST)                      | Stomach              | NR     | Low risk for aggressive behaviour        | ST         | Laparoscopy and resection                          | No                                       | No                        | FFPE                | Fluidigm                 | Not Done             | Not Done        |
| 54     | 60.1         | F   | NA           | NA             | Gastrointestinal stromal tumour (GIST)                      | Small bowel          | NR     | Low malignant potential                  | ST         | Laparoscopic small bowel resection and gastroscopy | No                                       | Father: Lung ca.          | FFPE                | Fluidigm                 | Not Done             | Not Done        |
| 55     | 66.2         | F   | NA           | NA             | Gastrointestinal stromal tumour (GIST)                      | Stomach              | NR     | Low malignant potential                  | ST         | Laparoscopic excision                              | No                                       | Father: Colon ca.         | FFPE                | Fluidigm                 | Not Done             | Not Done        |
| 56     | NR           | F   | NA           | NR             | Myxoid liposarcoma                                          | NR                   | NR     | NR                                       | ST         | NR                                                 | NR                                       | NR                        | FFT                 | Fluidigm                 | Done                 | Done            |
| 57     | 13.0         | F   | NR           | NR             | Embryonal sarcoma of the liver                              | Liver                | NR     | NR                                       | ST         | NR                                                 | NR                                       | NR                        | FFPE                | Sanger                   | Not Done             | Not Done        |
| 58     | 9.0          | F   | NR           | NR             | Embryonal sarcoma of the liver                              | Liver                | NR     | NR                                       | ST         | NR                                                 | NR                                       | NR                        | FFPE                | Sanger                   | Not Done             | Not Done        |
| 59     | 29.0         | M   | NR           | NR             | Embryonal sarcoma of the liver                              | Liver                | NR     | NR                                       | ST         | NR                                                 | NR                                       | NR                        | FFPE                | Sanger                   | Not Done             | Not Done        |
| 60     | 6.5          | M   | NR           | NR             | Embryonal sarcoma of the liver                              | Liver                | NR     | NR                                       | ST         | NR                                                 | NR                                       | NR                        | FFPE                | Sanger                   | Not Done             | Not Done        |
| 61     | 0.3          | M   | NA           | NA             | Multicystic sarcoma of the thigh (undifferentiated sarcoma) | Thigh                | NR     | NR                                       | ST         | NR                                                 | NR                                       | NR                        | FFPE                | Sanger                   | Not Done             | Not Done        |

**Abbreviations:** BCC, basal cell carcinoma; Ca, carcinoma; CNV, copy number variation; Diff, differentiation; Dx, diagnosis; F, female; FFPE, formalin-fixed paraffin-embedded; FFT, fresh frozen tissue; L, left; M, male; Mets, metastasis; MLPA, Multiplex Ligation-dependent Probe Amplification assay; NA, not applicable; NR, not reported; PNET, primitive neuroectodermal tumour; R, right; SCC, squamous cell carcinoma; ST, soft tissue; TURP, Transurethral resection of the prostate; VATS, Video-assisted thoracoscopic surgery.

**SUPPLEMENTAL TABLE S2b. Ewing sarcoma clinical information**

| Case | Age at Dx (years) | Sex | Diagnosis     | Sample Type | <i>DICER1</i> Sequencing Method | Tumour CNV Analysis (ddPCR) |
|------|-------------------|-----|---------------|-------------|---------------------------------|-----------------------------|
| 62   | 48.0              | F   | Ewing sarcoma | FFT         | Fluidigm                        | Done                        |
| 63   | 46.5              | M   | Ewing sarcoma | FFT         | Fluidigm                        | Done                        |
| 64   | 49.5              | M   | Ewing sarcoma | FFPE        | Fluidigm                        | Not Done                    |
| 65   | 25.0              | F   | Ewing sarcoma | FFPE        | Fluidigm                        | Not Done                    |
| 66   | 39.8              | F   | Ewing sarcoma | FFT         | Fluidigm                        | Done                        |
| 67   | 19.0              | M   | Ewing sarcoma | FFPE        | Fluidigm                        | Not Done                    |
| 68   | 25.0              | M   | Ewing sarcoma | FFT         | Fluidigm                        | Done                        |
| 69   | 19.0              | F   | Ewing sarcoma | FFT         | Fluidigm                        | Done                        |
| 70   | 0.7               | F   | Ewing sarcoma | FFPE        | Fluidigm                        | Not Done                    |
| 71   | 5.0               | M   | Ewing sarcoma | FFT         | Fluidigm                        | Done                        |
| 72   | 1.7               | M   | Ewing sarcoma | FFPE        | Fluidigm                        | Not Done                    |
| 73   | 3.0               | F   | Ewing sarcoma | FFPE        | Sanger                          | Not Done                    |

**Abbreviations:** CNV, copy number variation; ddPCR, droplet digital polymerase chain reaction; Dx, diagnosis; F, female; FFT, fresh frozen tumour; FFPE, formalin-fixed paraffin-embedded; M, male.

**SUPPLEMENTAL TABLE S3. *DICER1* variants identified**

| Case # | Patient Information |     |                                      |                      | Variant Information   |                |         |                         | Variant Frequency Data |                           | Variant Effect Prediction |                           |                  |
|--------|---------------------|-----|--------------------------------------|----------------------|-----------------------|----------------|---------|-------------------------|------------------------|---------------------------|---------------------------|---------------------------|------------------|
|        | Age at Dx (y)       | Sex | Diagnosis                            | Tumour Site          | DNA Change            | Protein Change | Exon    | Variant ID              | Origin                 | ExAC MAF % (allele count) | EVS MAF %                 | PolyPhen-2 (score)        | SIFT (score)     |
| 1      | 23                  | F   | Recurrent embryonal rhabdomyosarcoma | Retroperitoneum      | c.1786_1787insA       | p.T596Nfs*3    | 11      | --                      | Somatic                | Not available             | Not available             | NA                        | NA               |
|        |                     |     |                                      |                      | c.2040+53_2040+54insT | --             | 12      | rs397807177             | Germ-line              | Not available             | Not available             | NA                        | NA               |
|        |                     |     |                                      |                      | c.5439G>T             | p.E1813D       | 25      | --                      | Somatic                | Not available             | Not available             | Probably Damaging (0.997) | Damaging (0)     |
| 11     | 24.3                | F   | Angiosarcoma                         | Right breast         | c.5145C>T             | p.L1715L       | 24      | rs139500905             | Germ-line              | 0.1475 (179/121396)       | 0.1538                    | NA                        | Tolerated (1)    |
| 14     | 71                  | M   | Undifferentiated pleomorphic sarcoma | Right thigh          | c.5145C>T             | p.L1715L       | 24      | rs139500905             | Germ-line              | 0.1475 (179/121396)       | 0.1538                    | NA                        | Tolerated (1)    |
| 20     | 77.9                | M   | Undifferentiated pleomorphic sarcoma | Ilium                | c.884C>G              | p.S295C        | 7       | rs548231008             | Somatic                | 0.0952 (115/120792)       | Not available             | Probably Damaging (0.989) | Tolerated (0.06) |
| 28     | 87.4                | M   | Undifferentiated pleomorphic sarcoma | Left forearm         | c.4014G>A             | p.A1338A       | 21      | rs143454689             | Germ-line              | 0.1043 (126/120760)       | 0.0384                    | NA                        | Tolerated (0.52) |
| 38     | 68.1                | M   | Myxofibrosarcoma                     | Right chest wall     | c.2040+29T>C          | --             | Int. 12 | rs370866625             | Germ-line              | 0.01571 (19/120918)       | Not available             | NA                        | NA               |
| 39     | 61                  | M   | Leiomyosarcoma                       | Right inguinal       | c.1377-4T>G           | --             | Int. 8  | rs192490028             | Germ-line              | 0.333 (401/120416)        | 0.3153                    | NA                        | NA               |
| 46     | 79                  | F   | Pleomorphic sarcoma with giant cells | Left adductor magnus | c.3208C>G             | p.L1070V       | 20      | --                      | Somatic                | Not available             | Not available             | Probably Damaging (1.000) | Damaging (0.01)  |
| 65     | 25                  | F   | Ewing Sarcoma                        | Not available        | c.2614G>A             | p.A872T        | 16      | COSM959266; rs149242330 | Not known              | 0.08432 (102/120974)      | 0.0846                    | Probably Damaging (0.8)   | Tolerated (0.5)  |
| 73     | 3                   | F   | Ewing Sarcoma                        | Thorax               | c.2257-7A>G           | --             | 14      | --                      | Germ-line              | Not available             | Not available             | NA                        | NA               |

**Abbreviations:** Dx, diagnosis; EVS, Exome Variant Server (available at <http://evs.gs.washington.edu/EVS/>); ExAC, Exome Aggregation Consortium (available at <http://exac.broadinstitute.org/>); F, female; Int., intron; NA, not applicable; M, male; MAF, minor allele frequency.

**SUPPLEMENTALTABLE S4. ddPCR Results: Investigation of mosaic origin of *DICER1* mutations in Case 1**

|                      | Exon 11 Mutation: c.1786_1787insA    |                                      |                               | Exon 25 Hotspot Mutation: c.5439G>T  |                                      |                               |
|----------------------|--------------------------------------|--------------------------------------|-------------------------------|--------------------------------------|--------------------------------------|-------------------------------|
|                      | Replicate 1 Fractional Abundance (%) | Replicate 2 Fractional Abundance (%) | Mean Fractional Abundance (%) | Replicate 1 Fractional Abundance (%) | Replicate 2 Fractional Abundance (%) | Mean Fractional Abundance (%) |
| <b>CASE 1 TUMOUR</b> | 46.4%                                | 48.6%                                | 47.5%                         | 49.3%                                | 49%                                  | 49.15%                        |
| <b>CASE 1 NORMAL</b> | 0.89%                                | 1.34%                                | 1.12%                         | 0.87%                                | 1.30%                                | 1.09%                         |

**Interpretation:** Both the exon 11 and exon 25 mutations were detected in approximately 1.1% in the patient’s adjacent normal DNA sample. Our interpretation of the mutations being present at almost exactly the same frequency is that there is low-level tumour DNA contamination of the adjacent normal sample. The results of the ddPCR experiment suggest that it is unlikely that either of the pathogenic mutations from case 1 are mosaic in origin.

**SUPPLEMENTAL TABLE S5. Results of TruSight Tumour 15 Panel Sequencing of Case 1**

| Variant Information |           |           |     |     |        |          |                              |             |             | Variant Frequency Data |            |           | Case 1 - NORMAL |             |             |             |             | Case 1 - TUMOUR |             |             |             |                           | Notes                                        |
|---------------------|-----------|-----------|-----|-----|--------|----------|------------------------------|-------------|-------------|------------------------|------------|-----------|-----------------|-------------|-------------|-------------|-------------|-----------------|-------------|-------------|-------------|---------------------------|----------------------------------------------|
| Chr                 | Start     | End       | Ref | Alt | Gene   | Region   | Variant Information          | Variant ID  | COSMIC ID   | 1000G MAF %            | ExAC MAF % | ESP MAF % | Total Reads     | # Ref Reads | # Alt Reads | Ref % Freq. | Alt % Freq. | Total Reads     | # Ref Reads | # Alt Reads | Ref % Freq. | Alt % Freq.               |                                              |
| 4                   | 55141055  | 55141055  | A   | G   | PDGFRA | exon 12  | NM_006206:c.A1701G,p.P567P   | rs1873778   | COSM1430082 | 0.96                   | 0.988      | 0.96      | 39557           | 28          | 39506       | 0.1         | 99.9        | 29646           | 29          | 29610       | 0.1         | 99.9                      | Germ-line (homozygous)                       |
| 4                   | 55152040  | 55152040  | C   | T   | PDGFRA | exon 18  | NM_006206:c.C2472T,p.V824V   | rs2228230   | COSM22413   | 0.24                   | 0.182      | 0.2       | 22046           | 11306       | 10728       | 51.3        | 48.7        | 15282           | 7648        | 7626        | 50.0        | 49.9                      | Germ-line (heterozygous)                     |
| 4                   | 55602765  | 55602765  | G   | C   | KIT    | exon 18  | NM_000222:c.G2586C,p.L862L   | rs3733542   | COSM1325    | 0.16                   | 0.1159     | 0.19      | 35183           | 17595       | 17511       | 50.0        | 49.8        | 30476           | 14873       | 15536       | 48.8        | 51.0                      | Germ-line (heterozygous)                     |
| 7                   | 55128207  | 55128207  | A   | G   | EGFR   | intronic | NM_005228.3:c.88+41149A>G    | rs729969    | --          | 0.85                   | --         | --        | 5815            | 8           | 5803        | 0.1         | 99.8        | 4704            | 9           | 4692        | 0.2         | 99.7                      | Germ-line (homozygous)                       |
| 7                   | 55220177  | 55220177  | A   | G   | EGFR   | intronic | NM_005228.3:c.629-62A>G      | rs11506105  | --          | 0.55                   | --         | --        | 12445           | 6348        | 6093        | 51.0        | 49.0        | 9686            | 9497        | 183         | 98.0        | 1.9                       | Germ-line (heterozygous): Chr7 LOH in tumour |
| 7                   | 55228053  | 55228053  | A   | T   | EGFR   | intronic | NM_005228.3:c.1498+22A>T     | rs1558544   | --          | 0.77                   | 0.7697     | 0.66      | 4238            | 2207        | 2027        | 52.1        | 47.8        | 3541            | 3457        | 80          | 97.6        | 2.3                       | Germ-line (heterozygous): Chr7 LOH in tumour |
| 7                   | 116312986 | 116312986 | T   | C   | MET    | intronic | NM_000245.3:c.-15+355T>C     | rs38840     | --          | 0.88                   | --         | --        | 7201            | 10          | 7186        | 0.1         | 99.8        | 6061            | 12          | 6046        | 0.2         | 99.8                      | Germ-line (homozygous)                       |
| 7                   | 116319002 | 116319002 | A   | G   | MET    | intronic | NM_000245.3:c.-15+6371A>G    | rs714180    | --          | 0.63                   | --         | --        | 4379            | 6           | 4371        | 0.1         | 99.8        | 3351            | 1           | 3350        | 0.0         | 100.0                     | Germ-line (homozygous)                       |
| 17                  | 7572024   | 7572024   | T   | A   | TP53   | 3'UTR    | NM_001126112:c.*903A>T       | --          | --          | --                     | --         | 13188     | 12349           | 827         | 93.6        | 6.3         | 8111        | 7585            | 517         | 93.5        | 6.4         | Germ-line (low frequency) |                                              |
| 17                  | 7572026   | 7572026   | T   | A   | TP53   | 3'UTR    | NM_001126112:c.*901A>T       | --          | --          | --                     | --         | 13188     | 12230           | 945         | 92.7        | 7.2         | 8111        | 7554            | 553         | 93.1        | 6.8         | Germ-line (low frequency) |                                              |
| 17                  | 7572029   | 7572029   | T   | A   | TP53   | 3'UTR    | NM_001126112:c.*898A>T       | --          | --          | --                     | --         | 13187     | 12451           | 729         | 94.4        | 5.5         | 8111        | 7711            | 397         | 95.1        | 4.9         | Germ-line (low frequency) |                                              |
| 17                  | 37870837  | 37870837  | T   | C   | ERBB2  | intronic | NM_001005862.2:c.1059-702T>C | rs191397129 | --          | 0.0066                 | --         | --        | 3261            | 1635        | 1620        | 50.1        | 49.7        | 1916            | 950         | 963         | 49.6        | 50.3                      | Germ-line (heterozygous)                     |

**Genes targeted on panel:** TP53, NRAS, FOXL2, PIK3CA, KIT, PDGFRA, BRAF, EGFR, MET, GNAQ, RET, KRAS, AKT1, ERBB2, GNA11. **Abbreviations:** Alt, alternate allele; Freq. Frequency; LOH, loss of heterozygosity; MAF, minor allele frequency; Ref, reference allele.



**SUPPLEMENTAL TABLE S6. *DICER1* Copy Number Variation Results**

| Case # | Gender | Sarcoma Subtype                                     | <i>DICER1</i> Copy Number Variation Identified? * |
|--------|--------|-----------------------------------------------------|---------------------------------------------------|
| 1      | Female | Recurrent embryonal rhabdomyosarcoma                | No                                                |
| 2      | Female | Metastatic Leiomyosarcoma                           | No                                                |
| 3      | Female | Undifferentiated sarcoma                            | No                                                |
| 4      | Female | Parosteal osteosarcoma                              | No                                                |
| 5      | Male   | Undifferentiated pleomorphic sarcoma                | No                                                |
| 6      | Male   | High-grade intravascular sarcoma                    | No                                                |
| 7      | Male   | Undifferentiated pleomorphic sarcoma                | No                                                |
| 8      | Male   | Undifferentiated pleomorphic sarcoma                | No                                                |
| 10     | Female | Solitary fibrous tumour                             | No                                                |
| 11     | Female | Angiosarcoma                                        | No                                                |
| 12     | Female | Epithelioid haemangioendothelioma                   | No                                                |
| 14     | Male   | Undifferentiated pleomorphic sarcoma                | No                                                |
| 15     | Male   | Angiomatoid fibrous histiocytoma                    | No                                                |
| 16     | Male   | Ewing sarcoma                                       | No                                                |
| 17     | Female | Undifferentiated pleomorphic sarcoma                | No                                                |
| 18     | Female | Low grade chondrosarcoma                            | No                                                |
| 19     | Female | Undifferentiated pleomorphic sarcoma                | Yes (Gain)                                        |
| 20     | Male   | Undifferentiated pleomorphic sarcoma                | No                                                |
| 21     | Male   | Myxoid liposarcoma                                  | No                                                |
| 22     | Male   | Desmoplastic small round cell tumour                | No                                                |
| 23     | Female | Adamantinoma                                        | No                                                |
| 24     | Female | Undifferentiated pleomorphic sarcoma                | No                                                |
| 25     | Female | Undifferentiated pleomorphic sarcoma                | No                                                |
| 26     | Male   | Solitary fibrous tumour                             | No                                                |
| 27     | Male   | Dedifferentiated liposarcoma                        | Yes (Gain)                                        |
| 28     | Male   | Undifferentiated pleomorphic sarcoma                | No                                                |
| 30     | Male   | Metastatic epithelioid sarcoma                      | No                                                |
| 31     | Female | Periacetabular osteosarcoma                         | Yes (Gain)                                        |
| 32     | Male   | Ewing sarcoma/ PNET                                 | No                                                |
| 33     | Male   | Metastatic clear cell sarcoma                       | No                                                |
| 34     | Male   | Chordoma (post radiotherapy)                        | No                                                |
| 35     | Female | Myxofibrosarcoma                                    | No                                                |
| 36     | Male   | Myxoid liposarcoma (post radiotherapy)              | No                                                |
| 37     | Female | Ewing sarcoma (post-chemotherapy)                   | No                                                |
| 38     | Male   | Myxofibrosarcoma                                    | No                                                |
| 39     | Male   | Leiomyosarcoma                                      | No                                                |
| 40     | Female | Undifferentiated pleomorphic sarcoma                | No                                                |
| 41     | Female | Liposarcoma                                         | No                                                |
| 42     | Male   | Myxofibrosarcoma                                    | Yes (Loss)                                        |
| 43     | Female | Leiomyosarcoma                                      | No                                                |
| 44     | Female | Liposarcoma associated with radiotherapy changes    | No                                                |
| 45     | Male   | Liposarcoma with radiation effect                   | No                                                |
| 46     | Female | Pleomorphic sarcoma with giant cells                | No                                                |
| 47     | Female | Liposarcoma (post radiotherapy)                     | No                                                |
| 48     | Female | Undifferentiated pleomorphic sarcoma                | No                                                |
| 49     | Female | Low grade fibromyxoid sarcoma                       | No                                                |
| 50     | Male   | Epithelioid angiosarcoma                            | No                                                |
| 51     | Female | Metastatic malignant peripheral nerve sheath tumour | No                                                |
| 52     | Male   | Undifferentiated pleomorphic sarcoma                | No                                                |
| 56     | Female | Myxoid liposarcoma                                  | No                                                |
| 62     | Female | Ewing sarcoma                                       | Yes (Gain)                                        |
| 63     | Male   | Ewing sarcoma                                       | No                                                |
| 66     | Female | Ewing sarcoma                                       | No                                                |
| 68     | Male   | Ewing sarcoma                                       | No                                                |
| 69     | Female | Ewing sarcoma                                       | No                                                |
| 71     | Male   | Ewing sarcoma                                       | No                                                |

**Abbreviations:** CNV, copy number variation; F, female; M, Male. **Notes:** \* CNV analysis was performed using the droplet digital PCR system. Two different experiments were performed using a reference probe in either the TERT locus on Chromosome 5 or within the AMOT locus on Chromosome X. See Supplemental Information, Materials and Methods section for more details.

## SUPPLEMENTAL FIGURES

### Supplemental Figure S1

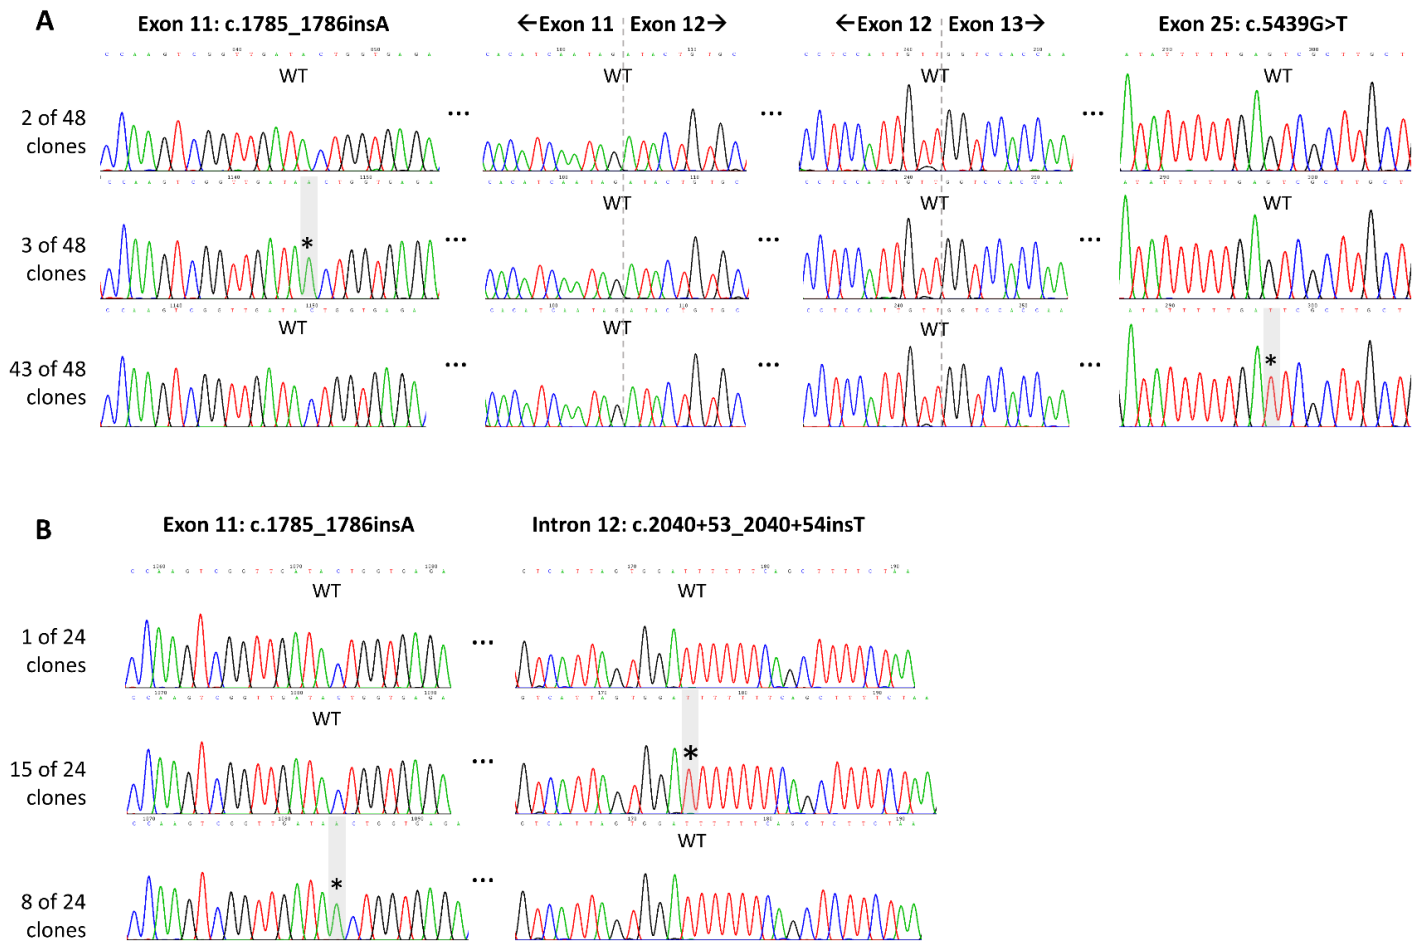

**Supplemental Figure S1. Cloning results – Case 1.** A) The phase and effect of the three identified *DICER1* mutations was assessed by cloning a fragment of complementary DNA (cDNA), synthesised from tumour RNA that spanned from exon 10 to exon 25 of *DICER1*, and sequencing of the resulting products. The chromatograms depict the three scenarios observed in cDNA clones. 2 of the 48 clones were wild-type at the position of both the exon 11 and exon 25 mutations. These cDNA fragments were likely derived from non-tumourous cells. 3 of 48 clones expressed the c.1785\_1786insA mutation, but were wild-type at the c.5439 position. The remaining 43 clones were found to be wild-type at the position of the exon 11, c.1785\_1786insA mutation, but mutated at position c.5439 in exon 25. This indicates that the c.1785\_1786insA and c.5439G>T mutations are present *in trans*. It is also evident that the majority of transcripts carrying the c.1785\_1786insA mutation are degraded by nonsense-mediated decay, since only 3/48 clones were found to express the mutation.

The intron 12 mutation (c.2040+53\_2040+54insT) did not seem to affect splicing of exons in the sequenced clones, as the exons 11 to 12 and 12 to 13 splice junctions were normal. **B)** The phase of the exon 11 and intron 13 mutations was assessed by cloning a DNA fragment that spanned from exon 11 to intron 12, and sequencing of the resulting products. The chromatograms depict the three scenarios observed in the DNA clones. 1 of the 24 clones was wild-type at the position of both the exon 11 and intron 12 mutations. This DNA fragment was likely derived from a non-tumourous cell. 15/24 clones carried only the intron 12, c.2040+53\_2040+54insT mutation. The remaining 8/24 clones carried the exon 11 c.1785\_1786insA mutation only. The exon 11 and intron 12 mutations are therefore present *in trans*. It can be deduced that the intron 12 (c.2040+53\_2040+54insT) and exon 25 (c.5439G>T) mutations are present *in cis*. Mutations are indicated by an asterisk; ellipses indicate omitted sequence; vertical dashed line denotes an exon-exon boundary. Abbreviation: WT, wild-type.

# Supplemental Figure S2

## A

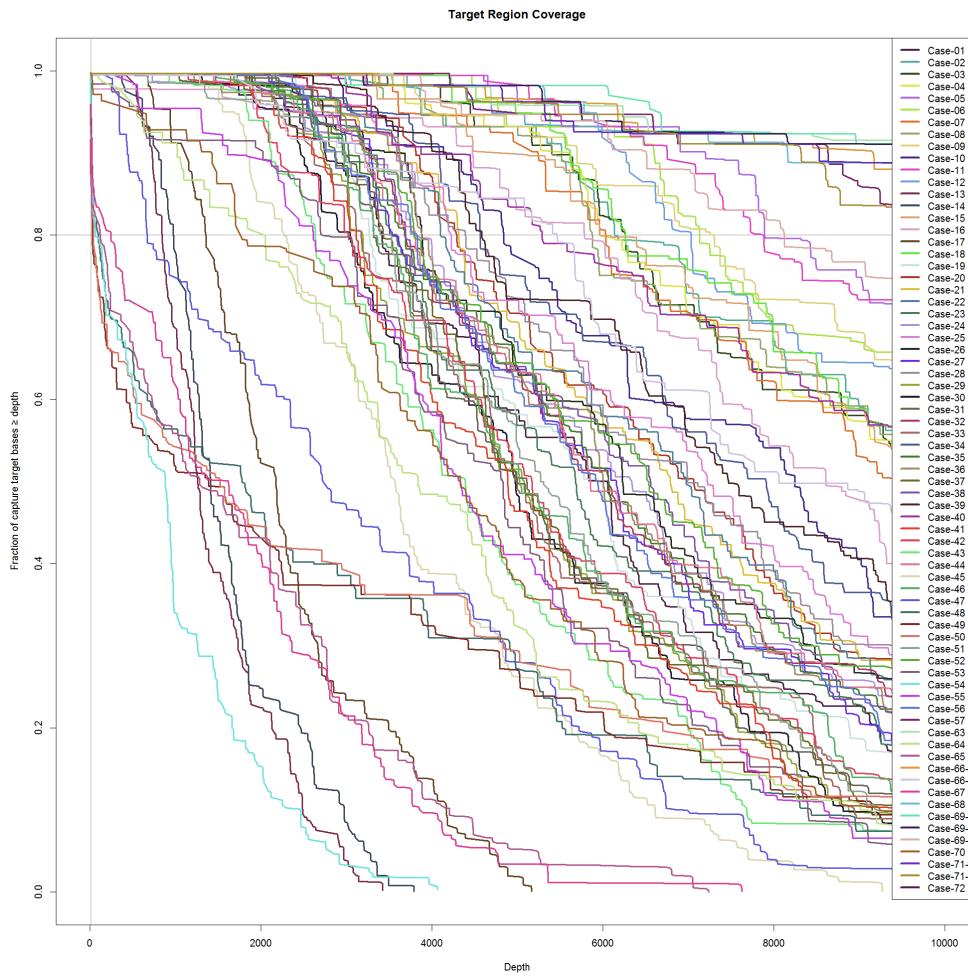

## B

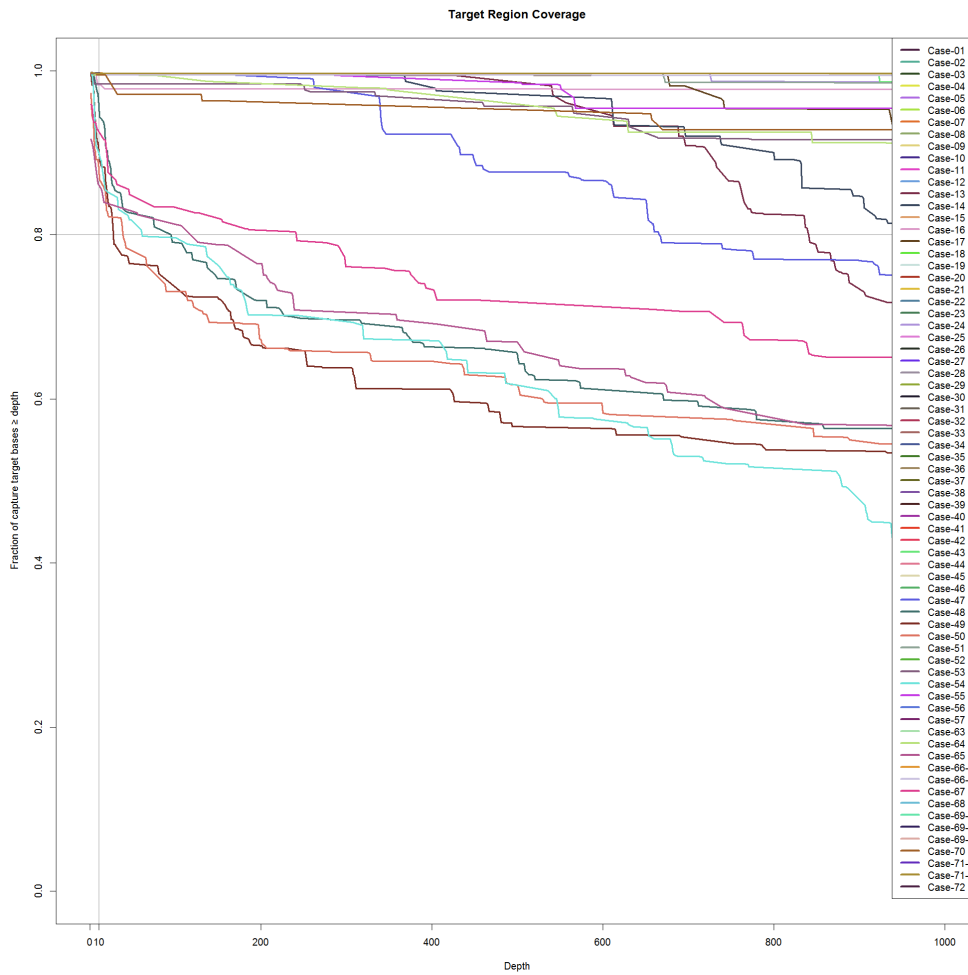

**Supplemental Figure S2. Depth of coverage plots.** Depth of coverage achieved for all 67 samples sequenced following capture with a custom Fluidigm Access Array (see Supplemental Tables S2a and S2b), viewed at a depth of 10,000 reads in plot **A** and 1,000 reads in plot **B**. The target region of the capture comprises all exons and exon-intron boundaries of *DICER1*. For all samples,  $\geq 80\%$  of the target region was covered at a depth of  $\geq 10$  reads.

### Supplemental Figure S3.

#### Representation of the germ-line *DICER1*

**MLPA results.** Three probe mixes for *DICER1* are used (A, panels I, II and III respectively), in combination with the P200-B1 set of control and reference probes from MRC-Holland (Amsterdam, The Netherlands) (Sabbaghian *et al*, 2014). All panels were generated using GeneMarker v. 1.70 (SoftGenetics, LLC). The blue zone indicates the region of peak ratio values for *DICER1* probes, and that for the P200-B1 probes is shown in grey. **A)** All 53 germ-line DNA samples screened for deletions or duplications in *DICER1* were not found to harbour any such alterations, with all ratios for *DICER1* exons (green squares, blue zone) falling within the normal peak ratio range of 0.7 to 1.3 (green horizontal lines). The sample used in this representation is a female, hence the peak ratio value of 0 for the Y chromosome (red square, grey zone, panel I-III). **B)** A sample with a known large *DICER1* exon deletion was used as an internal positive control. Affected exons have lower peak ratio values and are indicated by a red arrow.

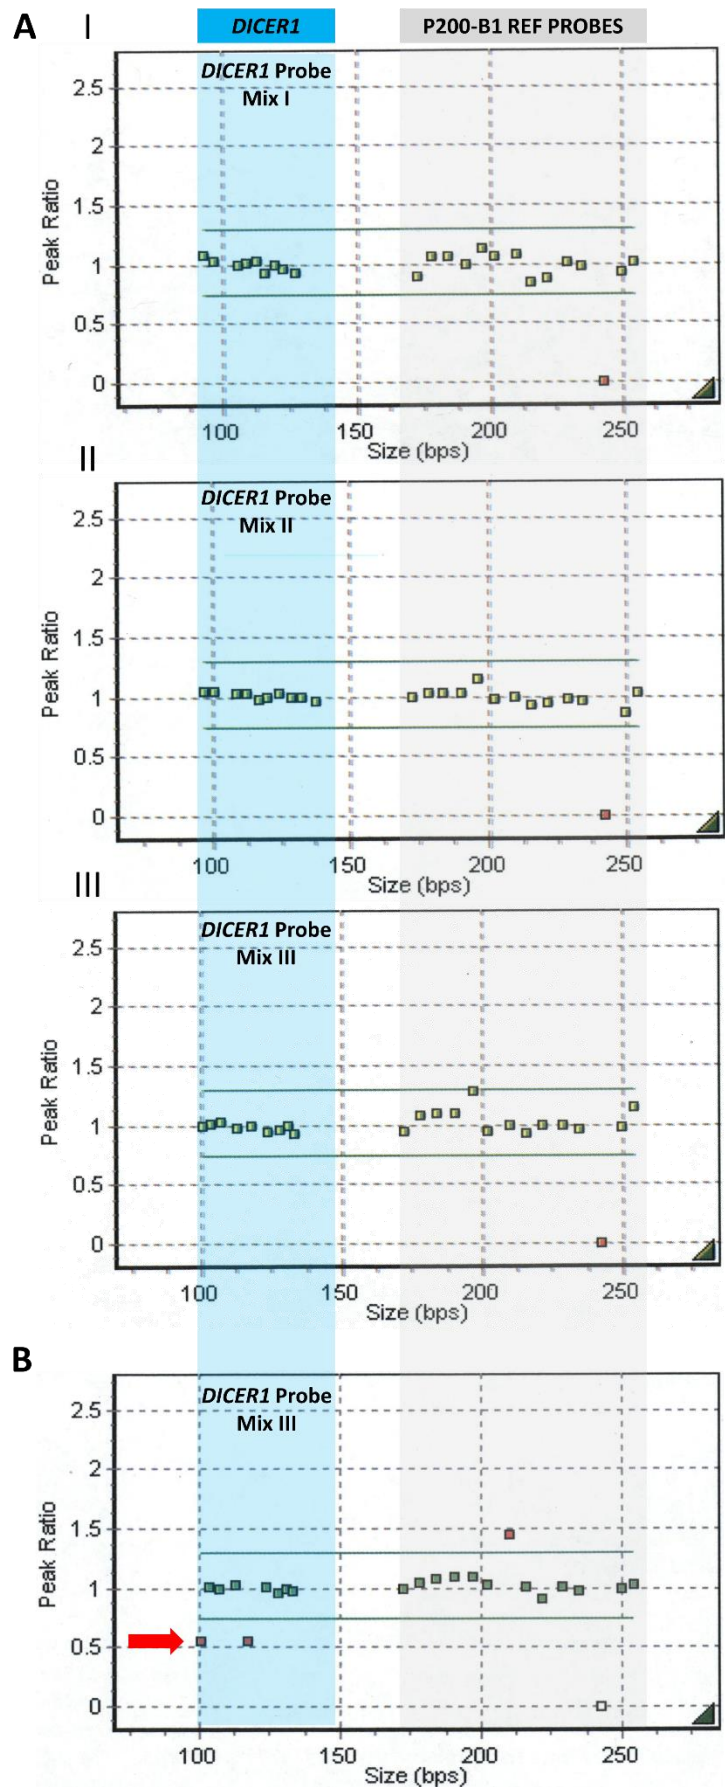

## SUPPLEMENTAL REFERENCES

Cingolani P, Patel VM, Coon M, Nguyen T, Land SJ, Ruden DM, Lu X (2012a) Using *Drosophila melanogaster* as a Model for Genotoxic Chemical Mutational Studies with a New Program, SnpSift. *Frontiers in genetics* **3**: 35

Cingolani P, Platts A, Wang le L, Coon M, Nguyen T, Wang L, Land SJ, Lu X, Ruden DM (2012b) A program for annotating and predicting the effects of single nucleotide polymorphisms, SnpEff: SNPs in the genome of *Drosophila melanogaster* strain w1118; iso-2; iso-3. *Fly* **6**(2): 80-92

Garrison E, Gabor M (2012) Haplotype-based variant detection from short-read sequencing. *Cornell University Library arXiv*: arXiv:1207.3907 [q-bio.GN]

Liu X, Jian X, Boerwinkle E (2013) dbNSFP v2.0: a database of human non-synonymous SNVs and their functional predictions and annotations. *Human mutation* **34**(9): E2393-402

Quinlan AR, Hall IM (2010) BEDTools: a flexible suite of utilities for comparing genomic features. *Bioinformatics (Oxford, England)* **26**(6): 841-2

Sabbaghian N, Srivastava A, Hamel N, Plourde F, Gajtko-Metera M, Niedziela M, Foulkes WD (2014) Germ-line deletion in DICER1 revealed by a novel MLPA assay using synthetic oligonucleotides. *European journal of human genetics : EJHG* **22**(4): 564-7

Sherry ST, Ward MH, Kholodov M, Baker J, Phan L, Smigielski EM, Sirotkin K (2001) dbSNP: the NCBI database of genetic variation. *Nucleic acids research* **29**(1): 308-11

Wu MK, Cotter MB, Pears J, McDermott MB, Fabian MR, Foulkes WD, O'Sullivan MJ (2016) Tumor progression in DICER1-mutated cystic nephroma-witnessing the genesis of anaplastic sarcoma of the kidney. *Human pathology* **53**: 114-20
